Functional analysis of *STIM1* mutations

1 **Functional analyses of *STIM1* mutations reveal a common pathomechanism**  
2 **for tubular aggregate myopathy and Stormorken syndrome**

3

4 **Georges Arielle Peche<sup>1,2,3,4</sup>, Coralie Spiegelhalter<sup>1,2,3,4</sup>, Roberto Silva-Rojas<sup>1,2,3,4</sup>,**  
5 **Jocelyn Laporte<sup>1,2,3,4\*</sup>, Johann Böhm<sup>1,2,3,4\*</sup>**

6

7 <sup>1</sup>Institut de Génétique et de Biologie Moléculaire et Cellulaire (IGBMC), 67404 Illkirch, France

8 <sup>2</sup>INSERM U1258, 67404 Illkirch, France

9 <sup>3</sup>CNRS, UMR7104, 67404 Illkirch, France

10 <sup>4</sup>Université de Strasbourg, 67404 Illkirch, France

11 \*The authors contributed equally to this work

12

13 Correspondence: Johann Böhm, Jocelyn Laporte

14 IGBMC, 1 Rue Laurent Fries, 67404 Illkirch

15 [johann@igbmc.fr](mailto:johann@igbmc.fr) / [jocelyn@igbmc.fr](mailto:jocelyn@igbmc.fr)

16 Tel: 0033 (0)3 88 65 34 12

17

18

19

20

## Functional analysis of *STIM1* mutations

### 21 **ABSTRACT**

22 Tubular aggregate myopathy (TAM) is a progressive disorder essentially involving muscle  
23 weakness, cramps, and myalgia. TAM clinically overlaps with Stormorken syndrome  
24 (STRMK), associating TAM with miosis, thrombocytopenia, hyposplenism, ichthyosis, short  
25 stature, and dyslexia. TAM and Stormorken syndrome arise from gain-of-function mutations in  
26 *STIM1* or *ORAI1*, both encoding key regulators of Ca<sup>2+</sup> homeostasis, and mutations in either  
27 gene results in excessive Ca<sup>2+</sup> entry. The pathomechanistic similarities and differences of TAM  
28 and Stormorken syndrome are only partially understood. Here we provide functional *in cellulo*  
29 experiments demonstrating that STIM1 harboring the TAM D84G or the STRMK R304W  
30 mutation similarly cluster and exert a dominant effect on the wild-type protein. Both mutants  
31 recruit ORAI1 to the clusters, induce major nuclear import of the Ca<sup>2+</sup>-dependent transcription  
32 factor NFAT, and trigger the formation of circular membrane stacks. In conclusion, the  
33 analyzed TAM and STRMK mutations have a comparable impact on STIM1 protein function  
34 and downstream effects of excessive Ca<sup>2+</sup> entry, highlighting that TAM and Stormorken  
35 syndrome involve a common pathomechanism.

36

37 **Keywords:** STIM1, tubular aggregate myopathy, Stormorken syndrome, SOCE, calcium

38

39

40

41

42

## Functional analysis of *STIM1* mutations

### 43 INTRODUCTION

44 Tubular aggregate myopathy (TAM) and Stormorken syndrome (STRMK) are spectra of the  
45 same disease affecting muscle, platelets, spleen, and skin (1, 2). The majority of the TAM  
46 patients primarily present with muscle weakness, cramps, and myalgia with a heterogeneous  
47 age of onset and disease severity (3-6). Additional features including thrombocytopenia,  
48 hyposplenism, miosis, ichthyosis, short stature, hypocalcemia, or dyslexia can be seen as well,  
49 and the occurrence of the totality of the multi-systemic signs constitutes the diagnosis of  
50 Stormorken syndrome (7-18).

51 Both TAM and Stormorken syndrome are characterized by the presence of densely packed  
52 membrane tubules in muscle fibers, and investigations on muscle sections by  
53 immunofluorescence have shown that these tubular aggregates contain various sarcoplasmic  
54 reticulum (SR) proteins, suggesting that they originate from the SR (4, 7, 15, 16, 19). The  
55 tubular aggregates are the histopathological hallmark of TAM and Stormorken syndrome, and  
56 were also described in hypokalemic periodic paralysis, myasthenic syndrome, malignant  
57 hyperthermia, inflammatory or ethyltoxic myopathy, and accumulate in normal muscle with  
58 age (20-25).

59 TAM and Stormorken syndrome are caused by heterozygous missense mutations in *STIM1* (4,  
60 10-12) (OMIM #605921) or *ORAI1* (12) (OMIM #610277), both encoding key factors of store-  
61 operated  $\text{Ca}^{2+}$  entry (SOCE). SOCE is a major mechanism regulating  $\text{Ca}^{2+}$  homeostasis and  
62 thereby drives a multitude of  $\text{Ca}^{2+}$ -dependent cellular functions including muscle contraction.  
63 *STIM1* has a single transmembrane domain and is primarily localized at the  
64 endoplasmic/sarcoplasmic reticulum with an N-terminal luminal part containing the  $\text{Ca}^{2+}$ -  
65 sensing EF hands, and a C-terminal cytosolic part containing coiled-coil domains (CC1-3).  
66 Upon  $\text{Ca}^{2+}$  store depletion, *STIM1* undergoes a conformational change, clusters in vicinity to

## Functional analysis of *STIM1* mutations

67 the plasma membrane, and recruits and activates the Ca<sup>2+</sup> channel ORAI1 to trigger  
68 extracellular Ca<sup>2+</sup> entry and reticular Ca<sup>2+</sup> store refill (26-28). Functional experiments have  
69 shown that the *STIM1* and *ORAI1* mutations induce excessive extracellular Ca<sup>2+</sup> entry despite  
70 replete reticular Ca<sup>2+</sup> stores (4, 10-12, 15).

71 Fourteen different *STIM1* mutations have been described in patients with TAM and Stormorken  
72 syndrome, including 12 mutations in the luminal EF-hands, and two mutations in the cytosolic  
73 CC1 domain (3-14, 18). Patients with EF-hand mutations mainly manifest a muscle phenotype  
74 and only isolated multi-systemic features, while the most common R304W substitution in the  
75 cytosolic CC1 domain, found in thirteen unrelated families, was essentially described with the  
76 full clinical picture of Stormorken syndrome (7, 10-14).

77 The shared genetic causes of TAM and Stormorken syndrome, the consistent skeletal muscle  
78 histopathology, and the overlapping clinical presentation of affected individuals raises the  
79 possibility of a common sequence of events leading to either TAM or STRMK. In an attempt  
80 to elucidate and compare the cellular defects underlying both disorders, we performed a series  
81 of functional and comparative *in cellulo* experiments. We demonstrate that both the TAM D84G  
82 and the STRMK R304W mutation similarly impact on STIM1 migration and clustering at the  
83 plasma membrane, the interaction with ORAI1, the nuclear translocation of the Ca<sup>2+</sup>-dependent  
84 transcription factor NFAT, and the formation of membrane stacks. We therefore conclude that  
85 TAM and Stormorken syndrome involve a common pathomechanism.

## 86 MATERIALS AND METHODS

### 87 Constructs

88 The human YFP-STIM1, mCherry-STIM1, ORAI1-eGFP, and eGFP-NFAT constructs were  
89 kind gifts from Nicolas Demaurex (University of Geneva, Switzerland), Richard S. Lewis  
90 (Stanford University, USA), Liangyi Chen (Beijing University, China), and Cristina Ulivieri,

## Functional analysis of *STIM1* mutations

91 (Universita degli studi di Siena, Italy), respectively. The *STIM1* (c.251A>G; p.D84G,  
92 c.910C>T; p.R304W) and *ORAI1* (c.319G>A; p.V107M) point mutations were introduced by  
93 site-directed mutagenesis using the Pfu DNA polymerase (Stratagene, La Jolla, USA).

### 94 **Cell culture**

95 C2C12 murine myoblasts were cultured in DMEM, supplemented with 20% fetal calf serum  
96 (FCS) and 0.5% gentamycin (all Gibco Life Technologies, Carlsbad, USA), grown at 37°C and  
97 5% CO<sub>2</sub>, and transfected using Lipofectamine® 2000 (Invitrogen Life Technologies Carlsbad,  
98 USA) at 50% confluency in Opti-MEM (Gibco Life Technologies). HeLa cells were grown in  
99 DMEM with 5% FCS and 0.5% gentamycin and transfected at 70% confluency using  
100 Lipofectamine® 2000. Co-expression experiments were conducted using a 1:1 plasmid ratio.

101 Twenty-four hours post transfection, cells seeded on glass slides were fixed using 4%  
102 paraformaldehyde (PFA) for 20 min at RT, treated with 50mM ammonium chloride (NH<sub>4</sub>Cl)  
103 for 15 min and rinsed in 1xPBS. Nuclei were stained with DAPI (Sigma Aldrich), and the  
104 coverslips were mounted using FluorSave reagent (Calbiochem, Darmstadt, Germany). Cells  
105 were classified according to the cytosolic or nuclear localization of the eGFP-NFAT signal, and  
106 the statistical significance was assessed through one-way ANOVA followed by Dunnett's post-  
107 hoc test. All experiments were performed in triplicate and monitored with the Leica TCS SP8  
108 AOBS inverted confocal microscope equipped with a Leica HCX PL APO CS2 63x/1.4 oil  
109 immersion objective (Leica, Wetzlar, Germany).

### 110 **Total Internal Reflection Fluorescence (TIRF) microscopy**

111 The TIRF plane of acquisition was determined according to the YFP fluorescence detected at  
112 the plasma membrane, and the images were acquired at resting state and following addition of  
113 2µM thapsigargin (Sigma-Aldrich, Saint Louis, USA) using a Nikon TI-eclipse inverted  
114 microscope equipped with a 100x, 1.49 NA oil-immersion objective (Nikon, Tokyo, Japan).

## Functional analysis of *STIM1* mutations

### 115 **Correlative Light and Electron Microscopy (CLEM)**

116 Cells were cultured on micro-patterned aclar supports (29), transfected with WT or mutant  
117 YFP-STIM1. Cells were precisely located and imaged by confocal microscopy (Leica TCS  
118 SP2-AOBS), and then chemically fixed with 0.1M sodium cacodylate buffer containing 2.5%  
119 paraformaldehyde and 2.5% glutaraldehyde, and post-fixed in 1% osmium tetroxide for 1h at  
120 4°C. After extensive washing in distilled water, cells were incubated in 1% uranyl acetate for  
121 1h at 4°C, dehydrated through a graded series of ethanol solutions, and embedded in epoxy  
122 resin polymerized 48h at 60°C. Ultrathin sections (60 nm) were mounted on pioloform-coated  
123 slot grids and examined with a Philips CM12 (80 kV) electron microscope equipped with a  
124 Gatan ORIUS 1000 CCD camera (FEI Company Hillsboro, USA).

### 125 **RESULTS**

#### 126 **TAM and STRMK mutants constitutively cluster at the plasma membrane**

127 We first assessed the effect of the TAM and STRMK-related *STIM1* mutations on the SOCE-  
128 dependent accumulation of STIM1 in vicinity to the plasma membrane. To this aim, we  
129 transfected C2C12 myoblasts with WT or mutant (TAM D84G or STRMK R304W) YFP-  
130 STIM1, and monitored the fluorescence by TIRF microscopy. Cells expressing WT STIM1  
131 showed a diffuse signal inside the cell at the resting state, and addition of 2  $\mu$ M thapsigargin  
132 induced  $Ca^{2+}$ -store depletion and the formation of STIM1 clusters at the plasma membrane  
133 (Figure 1a). This is in agreement with previous studies showing that STIM1 migrates to the  
134 plasma membrane and clusters upon SOCE activation (30). In contrast, cells transfected with  
135 STIM1 D84G or R304W displayed clusters at the plasma membrane independently of  
136 thapsigargin treatment. This supports the idea that both TAM and STRMK-related *STIM1*  
137 mutations involve a gain-of-function resulting in constitutive STIM1 clustering despite replete  
138  $Ca^{2+}$  stores.

## Functional analysis of *STIM1* mutations

139 **Figure 1: Impact of TAM and STRMK mutations on STIM1 clustering.** (a) TIRF  
140 microscopy on transfected C2C12 muscle cells demonstrates that wild type STIM1 has a diffuse  
141 localization inside the cell, and clusters at the vicinity of the plasma membrane upon Ca<sup>2+</sup> store  
142 depletion through thapsigargin (TG). In contrast, both TAM D84G and STRMK R304W  
143 mutants cluster without TG treatment and independently of the reticular Ca<sup>2+</sup> load. (b) Co-  
144 transfection of C2C12 cells with differentially tagged STIM1 constructs shows that D84G and  
145 R304W STIM1 sequester wild type STIM1 to the clusters, revealing a dominant effect.

### 146 **TAM and STRMK mutants sequester WT STIM1**

147 Both TAM and Stormorken syndrome result from heterozygous *STIM1* missense mutations (4,  
148 10-12). To investigate a potential effect of mutant STIM1 on the wild type protein, we co-  
149 transfected C2C12 cells with WT or mutant YFP-STIM1 and WT mCherry-STIM1. Cells co-  
150 expressing differently tagged WT proteins displayed diffuse overlapping signals. Addition of  
151 thapsigargin provoked co-clustering of both WT proteins, illustrating that the fluorescent YFP  
152 and mCherry tags do not impact on the intracellular localization or clustering of STIM1 (Figure  
153 1b). Cells co-expressing D84G or R304W with WT STIM1 exhibited major STIM1 clusters of  
154 overlapping YFP and mCherry signals without thapsigargin treatment. These results  
155 demonstrate that both TAM and STRMK mutants recruit wild type STIM1 to the clusters  
156 without Ca<sup>2+</sup> store depletion, and thereby evidence a dominant effect leading to the constitutive  
157 clustering of WT STIM1.

### 158 **TAM and STRMK mutants recruit ORAI1 and are less sensitive to Ca<sup>2+</sup> influx**

159 The cytosolic coiled-coil domains of STIM1 contain the STIM1-ORAI1 activating domain  
160 (SOAR), which is essential for the interaction with the plasma membrane Ca<sup>2+</sup> channel ORAI1  
161 (26, 31, 32). To examine the effect of the TAM and STRMK mutations on the recruitment of  
162 ORAI1 to the STIM1 clusters, we transfected C2C12 cells with WT or mutant mCherry-STIM1

## Functional analysis of *STIM1* mutations

163 and WT ORAI1-eGFP (Figure 2). When co-expressed, WT STIM1 and WT ORAI1  
164 significantly co-cluster, and we also observed clusters containing STIM1 and ORAI1 in cells  
165 expressing mutant D84G or R304W STIM1 and WT ORAI1. To investigate the influence of  
166 Ca<sup>2+</sup> entry on the recruitment of ORAI1 to the STIM1 clusters, we next co-transfected HeLa  
167 cells with WT or mutant mCherry-STIM and mutant V107M ORAI1-eGFP (Figure 2). The  
168 V107M mutation affects an essential amino acid of the pore-forming unit of ORAI1, and has  
169 been shown to generate a channel with constant Ca<sup>2+</sup> permeability (15, 33). Major clusters were  
170 found in more than 80% of the cells expressing mutant STIM1 and mutant ORAI1,  
171 demonstrating that the leaky V107M ORAI1 channel is largely recruited to the D84G or R304W  
172 STIM1 clusters. In contrast, less than 10% of the cells expressing wild type STIM1 and mutant  
173 ORAI1 displayed prominent clusters. These data illustrate that steady Ca<sup>2+</sup> inflow through  
174 V107M ORAI1 efficiently disassembles or prevents the formation of wild type STIM1 clusters  
175 and thereby inactivates SOCE, while the mutation-induced STIM1 clusters persist  
176 independently of the Ca<sup>2+</sup> flux through the CRAC channel.

177 **Figure 2: Impact of the TAM and STRMK mutations on ORAI1 recruitment.** Confocal  
178 microscopy on co-transfected C2C12 cells shows that wild-type STIM1 co-localizes with wild-  
179 type ORAI1 in the clusters, but no clusters are seen in cells expressing wild-type STIM1 and  
180 the leaky V107M ORAI1 channel. In contrast, both STIM1 mutants D84G and R304W co-  
181 localize with V107M ORAI1 in clusters. For quantification, between 100 and 200 cells were  
182 counted per experiment and per condition. The total number of counted cells was set to 100%,  
183 the percentage of cells with major STIM1/ORAI1 clusters corresponds to the yellow bar, cells  
184 with minor cluster to the blue bar, and cells without clusters to the green bar. Error bars  
185 represent the standard deviation (SD), and the statistical difference compared to the first column  
186 of the set is indicated by \* for cells without clusters and by # for cells with major clusters. P-  
187 value < 0.001:\*\*\* or ####.



## Functional analysis of *STIM1* mutations

### 188 **TAM and STRMK mutants increase nuclear NFAT translocation**

189 NFATc2 (nuclear factor of activated T cells) belongs to the NFAT family of transcription  
190 factors. It has a cytosolic localization when inactive, and gets dephosphorylated through  
191 calcineurin upon increased cytosolic Ca<sup>2+</sup> levels, resulting in nuclear import (34). The ratio of  
192 nuclear versus cytoplasmic NFAT therefore reflects the Ca<sup>2+</sup> concentration in the cytosol and  
193 represents a suitable parameter to assess the downstream effect of excessive Ca<sup>2+</sup> entry resulting  
194 from *STIM1* mutations. In accordance, previous studies have shown that constitutively active  
195 STIM1 induces major NFAT translocation to the nucleus (35). To assess if the *STIM1* TAM  
196 and STRMK mutations similarly promote nuclear NFAT import, we co-transfected WT or  
197 mutant mCherry-STIM1 with eGFP-NFAT and quantified the intracellular NFAT localization  
198 (Figure 3). About 21% of the cells expressing WT STIM1 showed a nuclear NFAT localization.  
199 Following caffeine treatment, known to induce Ca<sup>2+</sup> release from the reticulum to the cytosol,  
200 nuclear NFAT was observed in 73% of the cells. Cells exogenously expressing D84G or  
201 R304W STIM1 displayed major nuclear NFAT translocation in the absence of caffeine  
202 treatment, with intense nuclear GFP signals in 58% and 61% of the cells, respectively.  
203 Quantification of the NFAT signal in the cytoplasm versus the nucleus revealed a ratio of 1.8  
204 for cells expressing WT STIM1, a ratio of 0.4 when treated with caffeine, and a ratio of 0.1 for  
205 cells expressing mutant D84G or R304W STIM1, illustrating that NFAT is mostly nuclear in  
206 cells transfected with mutant STIM1. Taken together, the STIM1 mutations D84G and R304W  
207 similarly and significantly promote nuclear NFAT import, demonstrating a downstream effect  
208 of cellular Ca<sup>2+</sup> excess induced by *STIM1* mutations.

209 **Figure 3: Impact of the TAM and STRMK mutations on NFAT localization.** Confocal  
210 microscopy on transfected HeLa cells and quantification shows a nuclear NFAT signal in 21%  
211 and 73% of cells expressing WT STIM1 before and after caffeine treatment. In untreated cells  
212 expressing D84G or R304W STIM1, nuclear NFAT was seen in 58% and 61% of the cells,

## Functional analysis of *STIM1* mutations

213 respectively. For quantification, between 100 and 200 cells per condition were counted in three  
214 independent experiments. The total number of counted cells was set to 100%, and the bars show  
215 the percentage of cells with nuclear NFAT in yellow and the percentage of cells with cytosolic  
216 NFAT in orange. Error bars represent the standard deviation. The statistical differences  
217 compared to cells transfected with WT *STIM1* are indicated by \* for nuclear NFAT and # for  
218 cytoplasmic NFAT. P-value < 0.001:\*\*\* or ####.

## 219 **TAM and STRMK mutants promote circular membrane stack formation**

220 Tubular aggregates are regular arrays of single- or double-walled membrane tubules appearing  
221 as honeycomb-like structures on transverse muscle sections, and are the histopathological  
222 hallmark of TAM and Stormoken syndrome (1, 2, 20, 36). To investigate the tubular aggregate  
223 formation *in cellulo*, we performed correlated light and electron microscopy (CLEM) on HeLa  
224 cells transfected with WT or mutant YFP-*STIM1* constructs. We observed membrane stacks in  
225 cells exogenously expressing D84G or R304W *STIM1*, but not in cells transfected with wild-  
226 type *STIM1* (Figure 4). These membrane stacks were most often found with a circular shape  
227 and connected with the endoplasmic reticulum. Our observations illustrate that *STIM1*  
228 harboring amino acid substitutions found in TAM and Stormorken syndrome patients induce  
229 the emergence of aberrant membrane accumulations, potentially representing the first step of  
230 tubular aggregate formation.

231 **Figure 4: Impact of the TAM and STRMK mutations on membrane architecture.** CLEM  
232 allows the analysis of the same cell by light and electron microscopy. In areas corresponding to  
233 fluorescent *STIM1* cluster, we observed circular membrane stacks in HeLa cells exogenously  
234 expressing the *STIM1* mutants D84G or R304W, but not in cells transfected with WT *STIM1*.

## 235 **DISCUSSION**

## Functional analysis of *STIM1* mutations

236 In this study, we investigated the molecular impact of *STIM1* mutations associated with tubular  
237 aggregate myopathy (TAM) and Stormorken syndrome (STRMK) at different levels of the  
238 SOCE pathway. We and others have previously shown that the TAM and STRMK mutations  
239 induce constitutive STIM1 clustering and activation of the Ca<sup>2+</sup> entry channels (4, 10-12). Here  
240 we addressed and compared the sequence of events leading to the cellular defects of TAM and  
241 Stormorken syndrome, and we found that the TAM D84G and STRMK R304W mutants  
242 similarly impact on STIM1 clustering, ORAI1 recruitment, Ca<sup>2+</sup>-dependent nuclear  
243 translocation of NFAT, and the formation of circular membrane stacks.

### 244 **The STIM1 mutations have multiple effects on cluster formation**

245 Through TIRF experiments we showed that both TAM D84G and STRMK R304W STIM1  
246 mutants constitutively cluster in the vicinity of the plasma membrane and recruit ORAI1 to the  
247 clusters although the amino acid substitutions affect different STIM1 protein domains. The EF-  
248 hand D84G mutation is believed to directly or indirectly impair Ca<sup>2+</sup> sensing, resulting in  
249 STIM1 unfolding, clustering, and exposure of the SOAR domain mediating the interaction with  
250 ORAI1 (1, 3). The luminal R304W mutation does not interfere with Ca<sup>2+</sup> binding. Instead, a  
251 recent study revealed that it induces a helical elongation within the coiled-coil domain, and  
252 thereby promotes STIM1 clustering and the exposure of the SOAR domain (37). In both cases,  
253 the mutations induce constitutive ORAI1 binding and activation, resulting in major  
254 extracellular Ca<sup>2+</sup> influx despite replete Ca<sup>2+</sup> stores (4, 10-12).

255 In agreement with previous studies (26), we observed that exogenously expressed wild-type  
256 STIM1 and ORAI1 co-localize and cluster in cells. However, co-expression of wild-type  
257 STIM1 and V107M ORAI1, previously described to generate a leaky channel with reduced  
258 Ca<sup>2+</sup> selectivity (15, 33), leads to a diffuse reticular distribution of STIM1. We therefore  
259 conclude that the constant ion entry through the permeable ORAI1 V107M channel either

## Functional analysis of *STIM1* mutations

260 dissipates the STIM1 clusters or prevents their formation. It is known that massive  $\text{Ca}^{2+}$  entry  
261 generates hyperpolarized potentials at the intracellular channel gate, and thereby promotes a  
262 rapid inactivation of ORAI1 and the dissociation of STIM1 from ORAI1 ( $\text{Ca}^{2+}$ -dependent  
263 inactivation, CDI)(38, 39). In contrast to wild-type STIM1, both TAM and STRMK mutants  
264 efficiently recruited V107M ORAI1 to the clusters. This suggests that the interaction between  
265 the STIM1 mutants and the leaky ORAI1 channel is insensitive to elevated local  $\text{Ca}^{2+}$  levels,  
266 and that the consequential reduction of CDI significantly contributes to excessive extracellular  
267  $\text{Ca}^{2+}$  entry. Consistently, decreased CDI was measured in lymphoblasts from a Stormorken  
268 syndrome patient, resulting in elevated basal  $\text{Ca}^{2+}$  levels (12).

269 We furthermore found that the clusters in cells co-expressing wild-type and mutant STIM1 are  
270 formed by both proteins despite replete  $\text{Ca}^{2+}$  stores. This indicates that the TAM or STRMK  
271 mutants are able to oligomerize with wild type STIM1 and to sequester the non-mutated protein  
272 to the clusters. Such an effect has not yet been described for *STIM1* mutations, and demonstrates  
273 that wild-type STIM1 contributes to the constitutive activation of ORAI1 and the excessive  
274 extracellular  $\text{Ca}^{2+}$  entry characterizing TAM and Stormorken syndrome.

### 275 **The downstream effects of excessive $\text{Ca}^{2+}$ entry**

276 As a consequence of constitutive STIM1 and ORAI1 activation, myoblasts from TAM/STRMK  
277 patients were found to exhibit increased basal  $\text{Ca}^{2+}$  levels in the cytosol (4, 5, 7, 10-12).  $\text{Ca}^{2+}$  is  
278 a physiological key factor triggering numerous signalling cascades including the NFAT  
279 pathway. The NFAT transcription factors mainly reside in the cytosol at low  $\text{Ca}^{2+}$   
280 concentrations, and become phosphorylated upon rising  $\text{Ca}^{2+}$  levels and translocate to the nuclei  
281 (34). In agreement, we found that cells expressing mutant STIM1 and manifesting prominent  
282 STIM1/ORAI1 clusters also displayed major nuclear NFAT translocation as compared to cells  
283 expressing wild- type STIM1. This is consistent with previous reports showing that the

## Functional analysis of *STIM1* mutations

284 exogenous expression of constitutively active STIM1 causes nuclear NFAT import (35), while  
285 silencing of STIM1 prevents NFAT translocation (40). In this context it is interesting to note  
286 that *STIM1* belongs to the NFAT target genes (41), suggesting a positive feedback controlling  
287 SOCE that might modulate the disease development of TAM and Stormorken syndrome.

288 Tubular aggregates are the histopathological hallmark in skeletal muscle of patients with tubular  
289 aggregate myopathy and Stormorken syndrome (20, 42, 43). Although it is not fully understood  
290 how the tubular aggregates form, they were shown to contain sarcoplasmic reticulum proteins  
291 and large amounts of Ca<sup>2+</sup> (19), and are therefore likely to be the consequence of excessive Ca<sup>2+</sup>  
292 storage in the reticulum. Accordingly, constitutive SOCE activation was shown to induce the  
293 formation of membrane stacks in transfected cells (44), and our CLEM experiments on cells  
294 expressing mutant STIM1 identified multilayer reticulum membranes of circular shape, which  
295 may represent the first step of tubular aggregate formation. Of note, tubular aggregates were  
296 not seen in the TAM/STRMK mouse model harbouring the STIM1 R304W mutation and  
297 clinically recapitulating the human disorder (45), demonstrating that tubular aggregate  
298 formation is species-specific and rather a consequence than a cause of the disease.

### 299 **Common pathomechanisms in tubular aggregate myopathy and Stormorken syndrome**

300 Tubular aggregate myopathy essentially affects skeletal muscle, and a subset of TAM patients  
301 harboring STIM1 EF-hand mutations additionally manifested one or several signs of  
302 Stormorken syndrome (3-5, 8, 9, 18). Conversely, Stormorken syndrome patients carrying the  
303 most common R304W mutation usually present the full clinical picture of TAM, miosis,  
304 thrombocytopenia, hyposplenism, ichthyosis, short stature, and dyslexia (7, 10-14), but  
305 individual patients with muscle weakness as the main clinical sign were also reported (9). This  
306 illustrates that TAM and Stormorken syndrome form a clinical continuum, and raises the  
307 question on the underlying common and diverging pathomechanisms. Here we investigated and

## Functional analysis of *STIM1* mutations

308 compared the SOCE pathway defects in cells expressing *STIM1* mutants, and we uncovered  
309 that the TAM and *STRMK* mutants had a comparable effect on cluster formation, *ORAI1*  
310 recruitment, nuclear NFAT translocation, and membrane rearrangements, indicating that TAM  
311 and Stormorken syndrome involve a common pathomechanism. The phenotypic differences  
312 between both disorders might result from a different mutational impact on fast  $\text{Ca}^{2+}$ -dependent  
313 inactivation (CDI), corresponding to the inactivation of *ORAI1* through high local  $\text{Ca}^{2+}$  levels.  
314 Indeed, electrophysiological studies have shown that the R304W mutant suppresses fast CDI,  
315 while *STIM1* harboring a luminal amino acid substitution was indistinguishable from the wild-  
316 type (12). This suggests that R304W, but not the EF-hand mutations causes a prolonged  $\text{Ca}^{2+}$   
317 influx and might account for the significant aberrations in multiple tissues in patients with  
318 Stormorken syndrome. Alternatively, especially the cytosolic *STIM1* R304W mutation might  
319 have an additional pathogenic effect on other interaction partners as the non-selective TRPC  
320 channels (46), and the full clinical picture of Stormorken syndrome would then result from the  
321 excessive entry of  $\text{Ca}^{2+}$  and other cations in the different tissues.

## 322 **Concluding remarks**

323 Here we demonstrate that missense mutations in different *STIM1* domains have a similar  
324 pathogenic effect on SOCE and downstream pathways. Our finding that *STIM1* mutations exert  
325 a dominant effect points to a suitable therapeutic approach for TAM and Stormorken syndrome  
326 through an allele-specific downregulation of *STIM1* expression. The resulting reduction of the  
327 *STIM1* protein level is thereby not expected to be pathogenic as heterozygous carriers of *STIM1*  
328 loss-of-function mutations, associated with immunodeficiency, are healthy(2).

## 329 **ACKNOWLEDGEMENTS**

330 We thank Catherine Koch and Pascal Kessler for their outstanding technical help, and Nicolas  
331 Demarex (University of Geneva, Switzerland), Richard S. Lewis (Stanford University, USA),

## Functional analysis of *STIM1* mutations

332 Liangyi Chen (Beijing University, China), and Cristina Olivieri, (Universita degli studi di  
333 Siena, Italy) for providing the plasmids.

## 334 CONFLICT OF INTEREST STATEMENT

335 None of the authors declares a conflict of interests.

## 336 AUTHOR CONTRIBUTIONS

337 JL and JB designed the study and supervised the research, GAP and CS performed the  
338 experiments, GAP, CS, RSR, and JB analyzed the data, GAP, JL, and JB wrote the manuscript.

## 339 REFERENCES

- 340 1. Bohm J, Laporte J. Gain-of-function mutations in STIM1 and ORAI1 causing tubular  
341 aggregate myopathy and Stormorken syndrome. *Cell Calcium*. 2018;76:1-9.
- 342 2. Lacruz RS, Feske S. Diseases caused by mutations in ORAI1 and STIM1. *Ann N Y*  
343 *Acad Sci*. 2015;1356:45-79.
- 344 3. Bohm J, Chevessier F, Koch C, Peche GA, Mora M, Morandi L, et al. Clinical,  
345 histological and genetic characterisation of patients with tubular aggregate myopathy caused by  
346 mutations in STIM1. *J Med Genet*. 2014;51(12):824-33.
- 347 4. Bohm J, Chevessier F, Maues De Paula A, Koch C, Attarian S, Feger C, et al.  
348 Constitutive activation of the calcium sensor STIM1 causes tubular-aggregate myopathy. *Am*  
349 *J Hum Genet*. 2013;92(2):271-8.
- 350 5. Walter MC, Rossius M, Zitzelsberger M, Vorgerd M, Muller-Felber W, Ertl-Wagner B,  
351 et al. 50 years to diagnosis: Autosomal dominant tubular aggregate myopathy caused by a novel  
352 STIM1 mutation. *Neuromuscul Disord*. 2015;25(7):577-84.

## Functional analysis of *STIM1* mutations

- 353 6. Hedberg C, Niceta M, Fattori F, Lindvall B, Ciolfi A, D'Amico A, et al. Childhood onset  
354 tubular aggregate myopathy associated with de novo *STIM1* mutations. *J Neurol.*  
355 2014;261(5):870-6.
- 356 7. Harris E, Burki U, Marini-Bettolo C, Neri M, Scotton C, Hudson J, et al. Complex  
357 phenotypes associated with *STIM1* mutations in both coiled coil and EF-hand domains.  
358 *Neuromuscul Disord.* 2017;27(9):861-72.
- 359 8. Noury JB, Bohm J, Peche GA, Guyant-Marechal L, Bedat-Millet AL, Chiche L, et al.  
360 Tubular aggregate myopathy with features of Stormorken disease due to a new *STIM1*  
361 mutation. *Neuromuscul Disord.* 2017;27(1):78-82.
- 362 9. Markello T, Chen D, Kwan JY, Horkayne-Szakaly I, Morrison A, Simakova O, et al.  
363 York platelet syndrome is a CRAC channelopathy due to gain-of-function mutations in *STIM1*.  
364 *Mol Genet Metab.* 2015;114(3):474-82.
- 365 10. Misceo D, Holmgren A, Louch WE, Holme PA, Mizobuchi M, Morales RJ, et al. A  
366 dominant *STIM1* mutation causes Stormorken syndrome. *Hum Mutat.* 2014;35(5):556-64.
- 367 11. Morin G, Bruechle NO, Singh AR, Knopp C, Jedraszak G, Elbracht M, et al. Gain-of-  
368 Function Mutation in *STIM1* (P.R304W) Is Associated with Stormorken Syndrome. *Hum*  
369 *Mutat.* 2014;35(10):1221-32.
- 370 12. Nesin V, Wiley G, Kousi M, Ong EC, Lehmann T, Nicholl DJ, et al. Activating  
371 mutations in *STIM1* and *ORAI1* cause overlapping syndromes of tubular myopathy and  
372 congenital miosis. *Proc Natl Acad Sci U S A.* 2014;111(11):4197-202.
- 373 13. Alonso-Jimenez A, Ramon C, Dols-Icardo O, Roig C, Gallardo E, Clarimon J, et al.  
374 Corpus callosum agenesis, myopathy and pinpoint pupils: consider Stormorken syndrome. *Eur*  
375 *J Neurol.* 2018;25(2):e25-e6.



## Functional analysis of *STIM1* mutations

- 376 14. Borsani O, Piga D, Costa S, Govoni A, Magri F, Artoni A, et al. Stormorken Syndrome  
377 Caused by a p.R304W *STIM1* Mutation: The First Italian Patient and a Review of the  
378 Literature. *Front Neurol.* 2018;9:859.
- 379 15. Bohm J, Bulla M, Urquhart JE, Malfatti E, Williams SG, O'Sullivan J, et al. *ORAI1*  
380 Mutations with Distinct Channel Gating Defects in Tubular Aggregate Myopathy. *Hum Mutat.*  
381 2017;38(4):426-38.
- 382 16. Endo Y, Noguchi S, Hara Y, Hayashi YK, Motomura K, Miyatake S, et al. Dominant  
383 mutations in *ORAI1* cause tubular aggregate myopathy with hypocalcemia via constitutive  
384 activation of store-operated Ca(2)(+) channels. *Hum Mol Genet.* 2015;24(3):637-48.
- 385 17. Garibaldi M, Fattori F, Riva B, Labasse C, Brochier G, Ottaviani P, et al. A novel gain-  
386 of-function mutation in *ORAI1* causes late-onset tubular aggregate myopathy and congenital  
387 miosis. *Clin Genet.* 2017;91(5):780-6.
- 388 18. Li A, Kang X, Edelman F, Waclawik AJ. Stormorken Syndrome: A Rare Cause of  
389 Myopathy With Tubular Aggregates and Dystrophic Features. *J Child Neurol.* 2019;34(6):321-  
390 4.
- 391 19. Chevessier F, Marty I, Paturneau-Jouas M, Hantai D, Verdier-Sahuque M. Tubular  
392 aggregates are from whole sarcoplasmic reticulum origin: alterations in calcium binding protein  
393 expression in mouse skeletal muscle during aging. *Neuromuscul Disord.* 2004;14(3):208-16.
- 394 20. Chevessier F, Bauche-Godard S, Leroy JP, Koenig J, Paturneau-Jouas M, Eymard B, et  
395 al. The origin of tubular aggregates in human myopathies. *J Pathol.* 2005;207(3):313-23.
- 396 21. Morgan-Hughes JA. Tubular aggregates in skeletal muscle: their functional significance  
397 and mechanisms of pathogenesis. *Curr Opin Neurol.* 1998;11(5):439-42.
- 398 22. Belaya K, Finlayson S, Slater CR, Cossins J, Liu WW, Maxwell S, et al. Mutations in  
399 *DPAGT1* cause a limb-girdle congenital myasthenic syndrome with tubular aggregates. *Am J*  
400 *Hum Genet.* 2012;91(1):193-201.

## Functional analysis of *STIM1* mutations

- 401 23. Guergueltcheva V, Muller JS, Dusl M, Senderek J, Oldfors A, Lindbergh C, et al.  
402 Congenital myasthenic syndrome with tubular aggregates caused by GFPT1 mutations. J  
403 Neurol. 2012;259(5):838-50.
- 404 24. Engel WK, Bishop DW, Cunningham GG. Tubular aggregates in type II muscle fibers:  
405 ultrastructural and histochemical correlation. J Ultrastruct Res. 1970;31(5-6):507-25.
- 406 25. Boncompagni S, Protasi F, Franzini-Armstrong C. Sequential stages in the age-  
407 dependent gradual formation and accumulation of tubular aggregates in fast twitch muscle  
408 fibers: SERCA and calsequestrin involvement. Age (Dordr). 2012;34(1):27-41.
- 409 26. Park CY, Hoover PJ, Mullins FM, Bachhawat P, Covington ED, Raunser S, et al. STIM1  
410 clusters and activates CRAC channels via direct binding of a cytosolic domain to Orai1. Cell.  
411 2009;136(5):876-90.
- 412 27. Luik RM, Wu MM, Buchanan J, Lewis RS. The elementary unit of store-operated Ca<sup>2+</sup>  
413 entry: local activation of CRAC channels by STIM1 at ER-plasma membrane junctions. J Cell  
414 Biol. 2006;174(6):815-25.
- 415 28. Stathopoulos PB, Zheng L, Li GY, Plevin MJ, Ikura M. Structural and mechanistic  
416 insights into STIM1-mediated initiation of store-operated calcium entry. Cell.  
417 2008;135(1):110-22.
- 418 29. Spiegelhalter C, Tosch V, Hentsch D, Koch M, Kessler P, Schwab Y, et al. From  
419 dynamic live cell imaging to 3D ultrastructure: novel integrated methods for high pressure  
420 freezing and correlative light-electron microscopy. PLoS One. 2010;5(2):e9014.
- 421 30. Liou J, Kim ML, Heo WD, Jones JT, Myers JW, Ferrell JE, Jr., et al. STIM is a Ca<sup>2+</sup>  
422 sensor essential for Ca<sup>2+</sup>-store-depletion-triggered Ca<sup>2+</sup> influx. Curr Biol. 2005;15(13):1235-  
423 41.
- 424 31. Yuan JP, Zeng W, Dorwart MR, Choi YJ, Worley PF, Muallem S. SOAR and the  
425 polybasic STIM1 domains gate and regulate Orai channels. Nat Cell Biol. 2009;11(3):337-43.

## Functional analysis of *STIM1* mutations

- 426 32. Kawasaki T, Lange I, Feske S. A minimal regulatory domain in the C terminus of  
427 STIM1 binds to and activates ORAI1 CRAC channels. *Biochem Biophys Res Commun.*  
428 2009;385(1):49-54.
- 429 33. Bulla M, Gyimesi G, Kim JH, Bhardwaj R, Hediger MA, Frieden M, et al. ORAI1  
430 channel gating and selectivity is differentially altered by natural mutations in the first or third  
431 transmembrane domain. *J Physiol.* 2018.
- 432 34. Garcia-Cozar FJ, Okamura H, Aramburu JF, Shaw KT, Pelletier L, Showalter R, et al.  
433 Two-site interaction of nuclear factor of activated T cells with activated calcineurin. *J Biol*  
434 *Chem.* 1998;273(37):23877-83.
- 435 35. Huang GN, Zeng W, Kim JY, Yuan JP, Han L, Muallem S, et al. STIM1 carboxyl-  
436 terminus activates native SOC, I(crac) and TRPC1 channels. *Nat Cell Biol.* 2006;8(9):1003-10.
- 437 36. Muller HD, Vielhaber S, Brunn A, Schroder JM. Dominantly inherited myopathy with  
438 novel tubular aggregates containing 1-21 tubulofilamentous structures. *Acta Neuropathol.*  
439 2001;102(1):27-35.
- 440 37. Fahrner M, Stadlbauer M, Muik M, Rathner P, Stathopoulos P, Ikura M, et al. A dual  
441 mechanism promotes switching of the Stormorken STIM1 R304W mutant into the activated  
442 state. *Nat Commun.* 2018;9(1):825.
- 443 38. Mullins FM, Park CY, Dolmetsch RE, Lewis RS. STIM1 and calmodulin interact with  
444 Orail to induce Ca<sup>2+</sup>-dependent inactivation of CRAC channels. *Proc Natl Acad Sci U S A.*  
445 2009;106(36):15495-500.
- 446 39. Zweifach A, Lewis RS. Rapid inactivation of depletion-activated calcium current  
447 (ICRAC) due to local calcium feedback. *J Gen Physiol.* 1995;105(2):209-26.
- 448 40. Aubart FC, Sassi Y, Coulombe A, Mougenot N, Vrignaud C, Leprince P, et al. RNA  
449 interference targeting STIM1 suppresses vascular smooth muscle cell proliferation and  
450 neointima formation in the rat. *Mol Ther.* 2009;17(3):455-62.

## Functional analysis of *STIM1* mutations

- 451 41. Phuong TT, Yun YH, Kim SJ, Kang TM. Positive feedback control between STIM1 and  
452 NFATc3 is required for C2C12 myoblast differentiation. *Biochem Biophys Res Commun.*  
453 2013;430(2):722-8.
- 454 42. Salviati G, Pierobon-Bormioli S, Betto R, Damiani E, Angelini C, Ringel SP, et al.  
455 Tubular aggregates: sarcoplasmic reticulum origin, calcium storage ability, and functional  
456 implications. *Muscle Nerve.* 1985;8(4):299-306.
- 457 43. Stormorken H, Sjaastad O, Langslet A, Sulg I, Egge K, Diderichsen J. A new syndrome:  
458 thrombocytopathia, muscle fatigue, asplenia, miosis, migraine, dyslexia and ichthyosis. *Clin*  
459 *Genet.* 1985;28(5):367-74.
- 460 44. Orci L, Ravazzola M, Le Coadic M, Shen WW, Demaurex N, Cosson P. From the  
461 Cover: STIM1-induced precortical and cortical subdomains of the endoplasmic reticulum. *Proc*  
462 *Natl Acad Sci U S A.* 2009;106(46):19358-62.
- 463 45. Silva-Rojas R, Treves S, Jacobs H, Kessler P, Messaddeq N, Laporte J, et al. STIM1  
464 over-activation generates a multi-systemic phenotype affecting skeletal muscle, spleen, eye,  
465 skin, bones, and the immune system in mice. *Hum Mol Genet.* 2018.
- 466 46. Worley PF, Zeng W, Huang GN, Yuan JP, Kim JY, Lee MG, et al. TRPC channels as  
467 STIM1-regulated store-operated channels. *Cell Calcium.* 2007;42(2):205-11.

# Figure 2

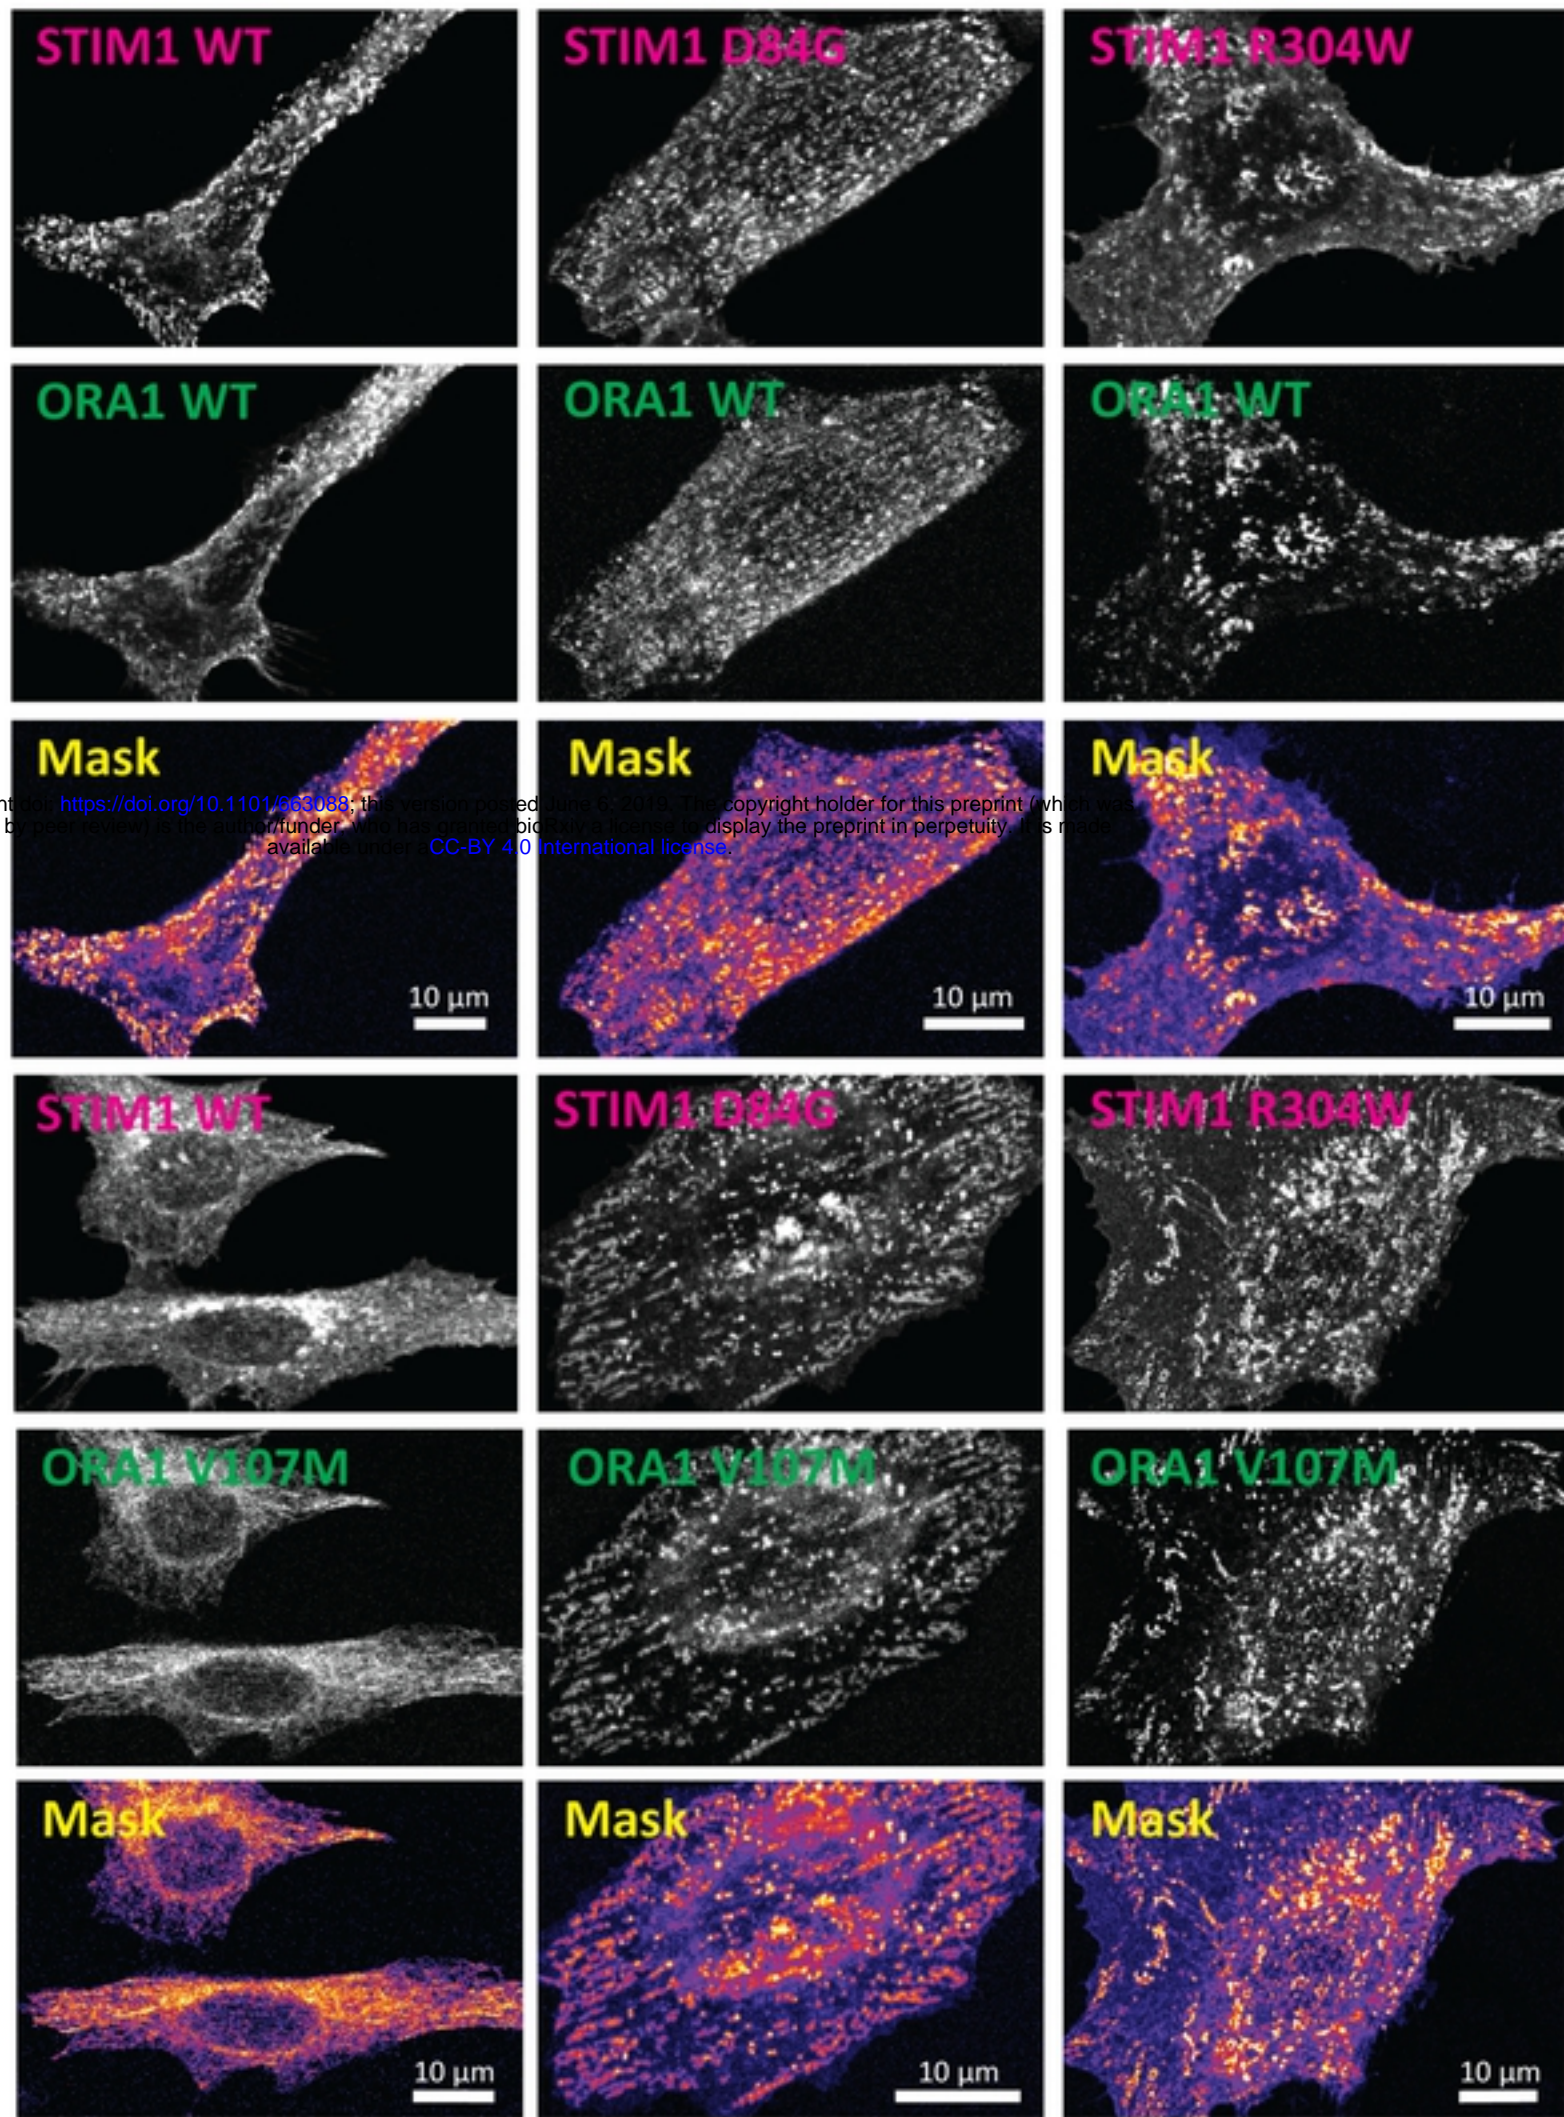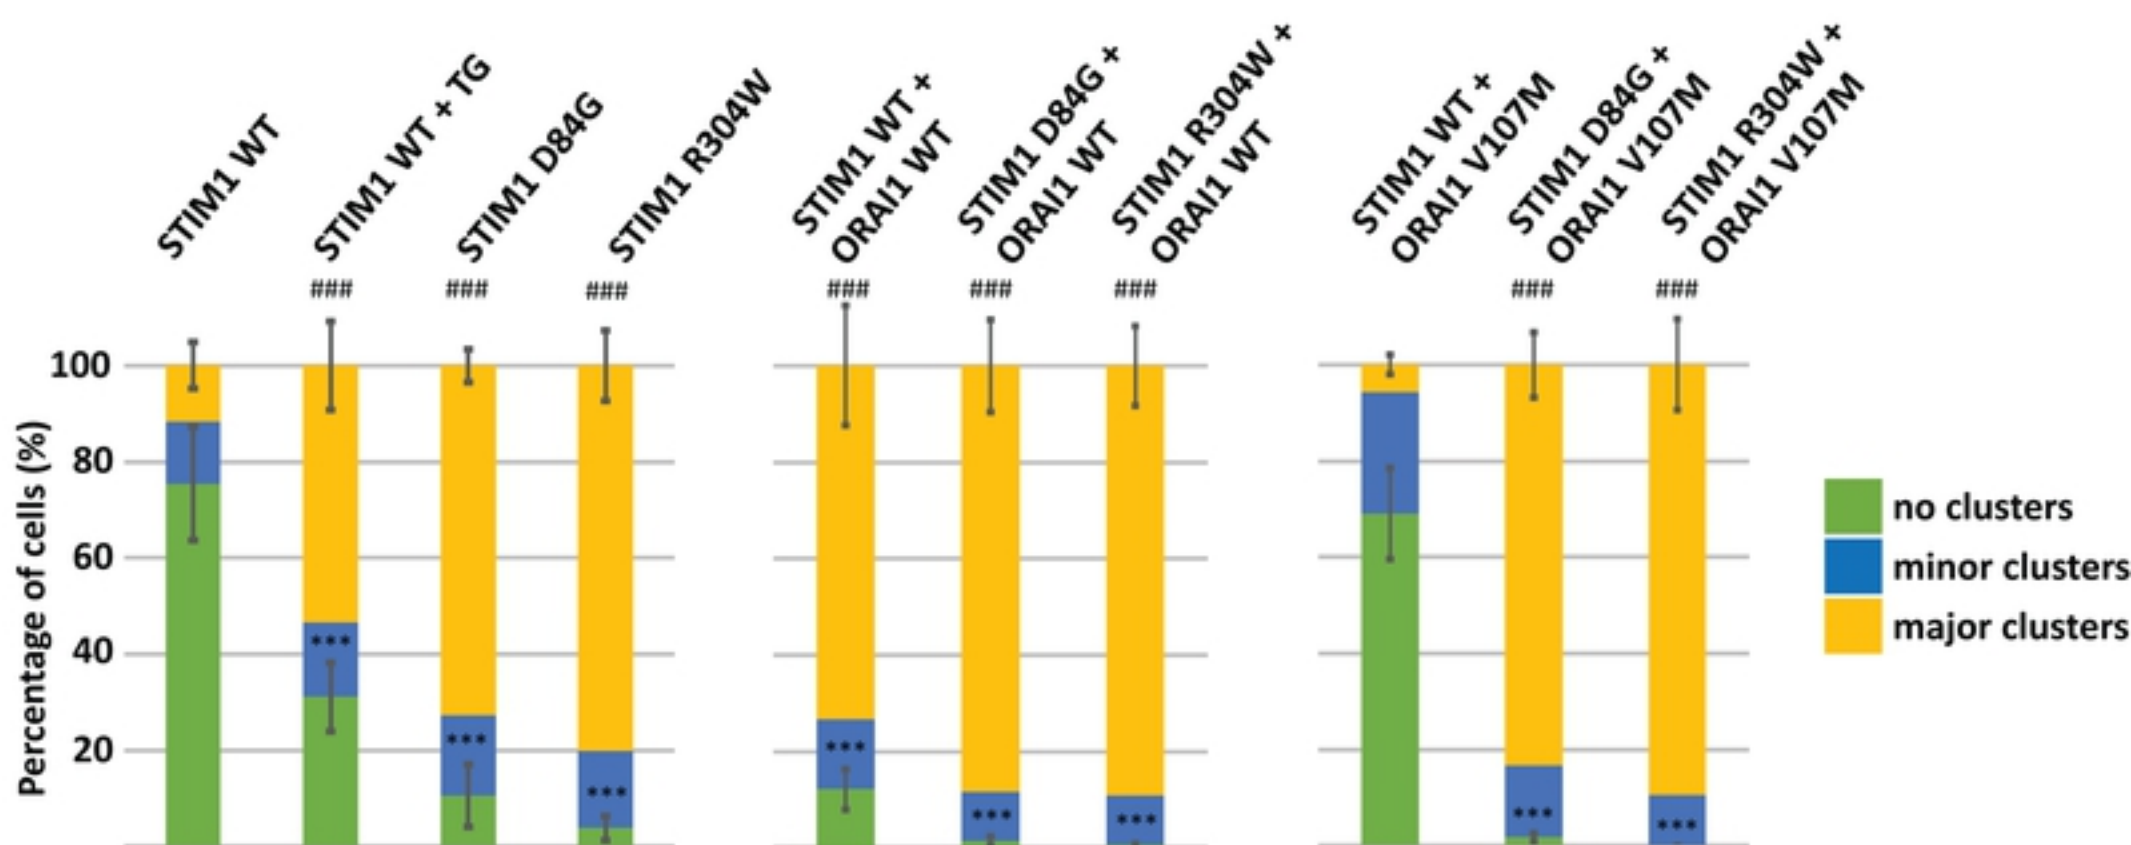

# Figure 3

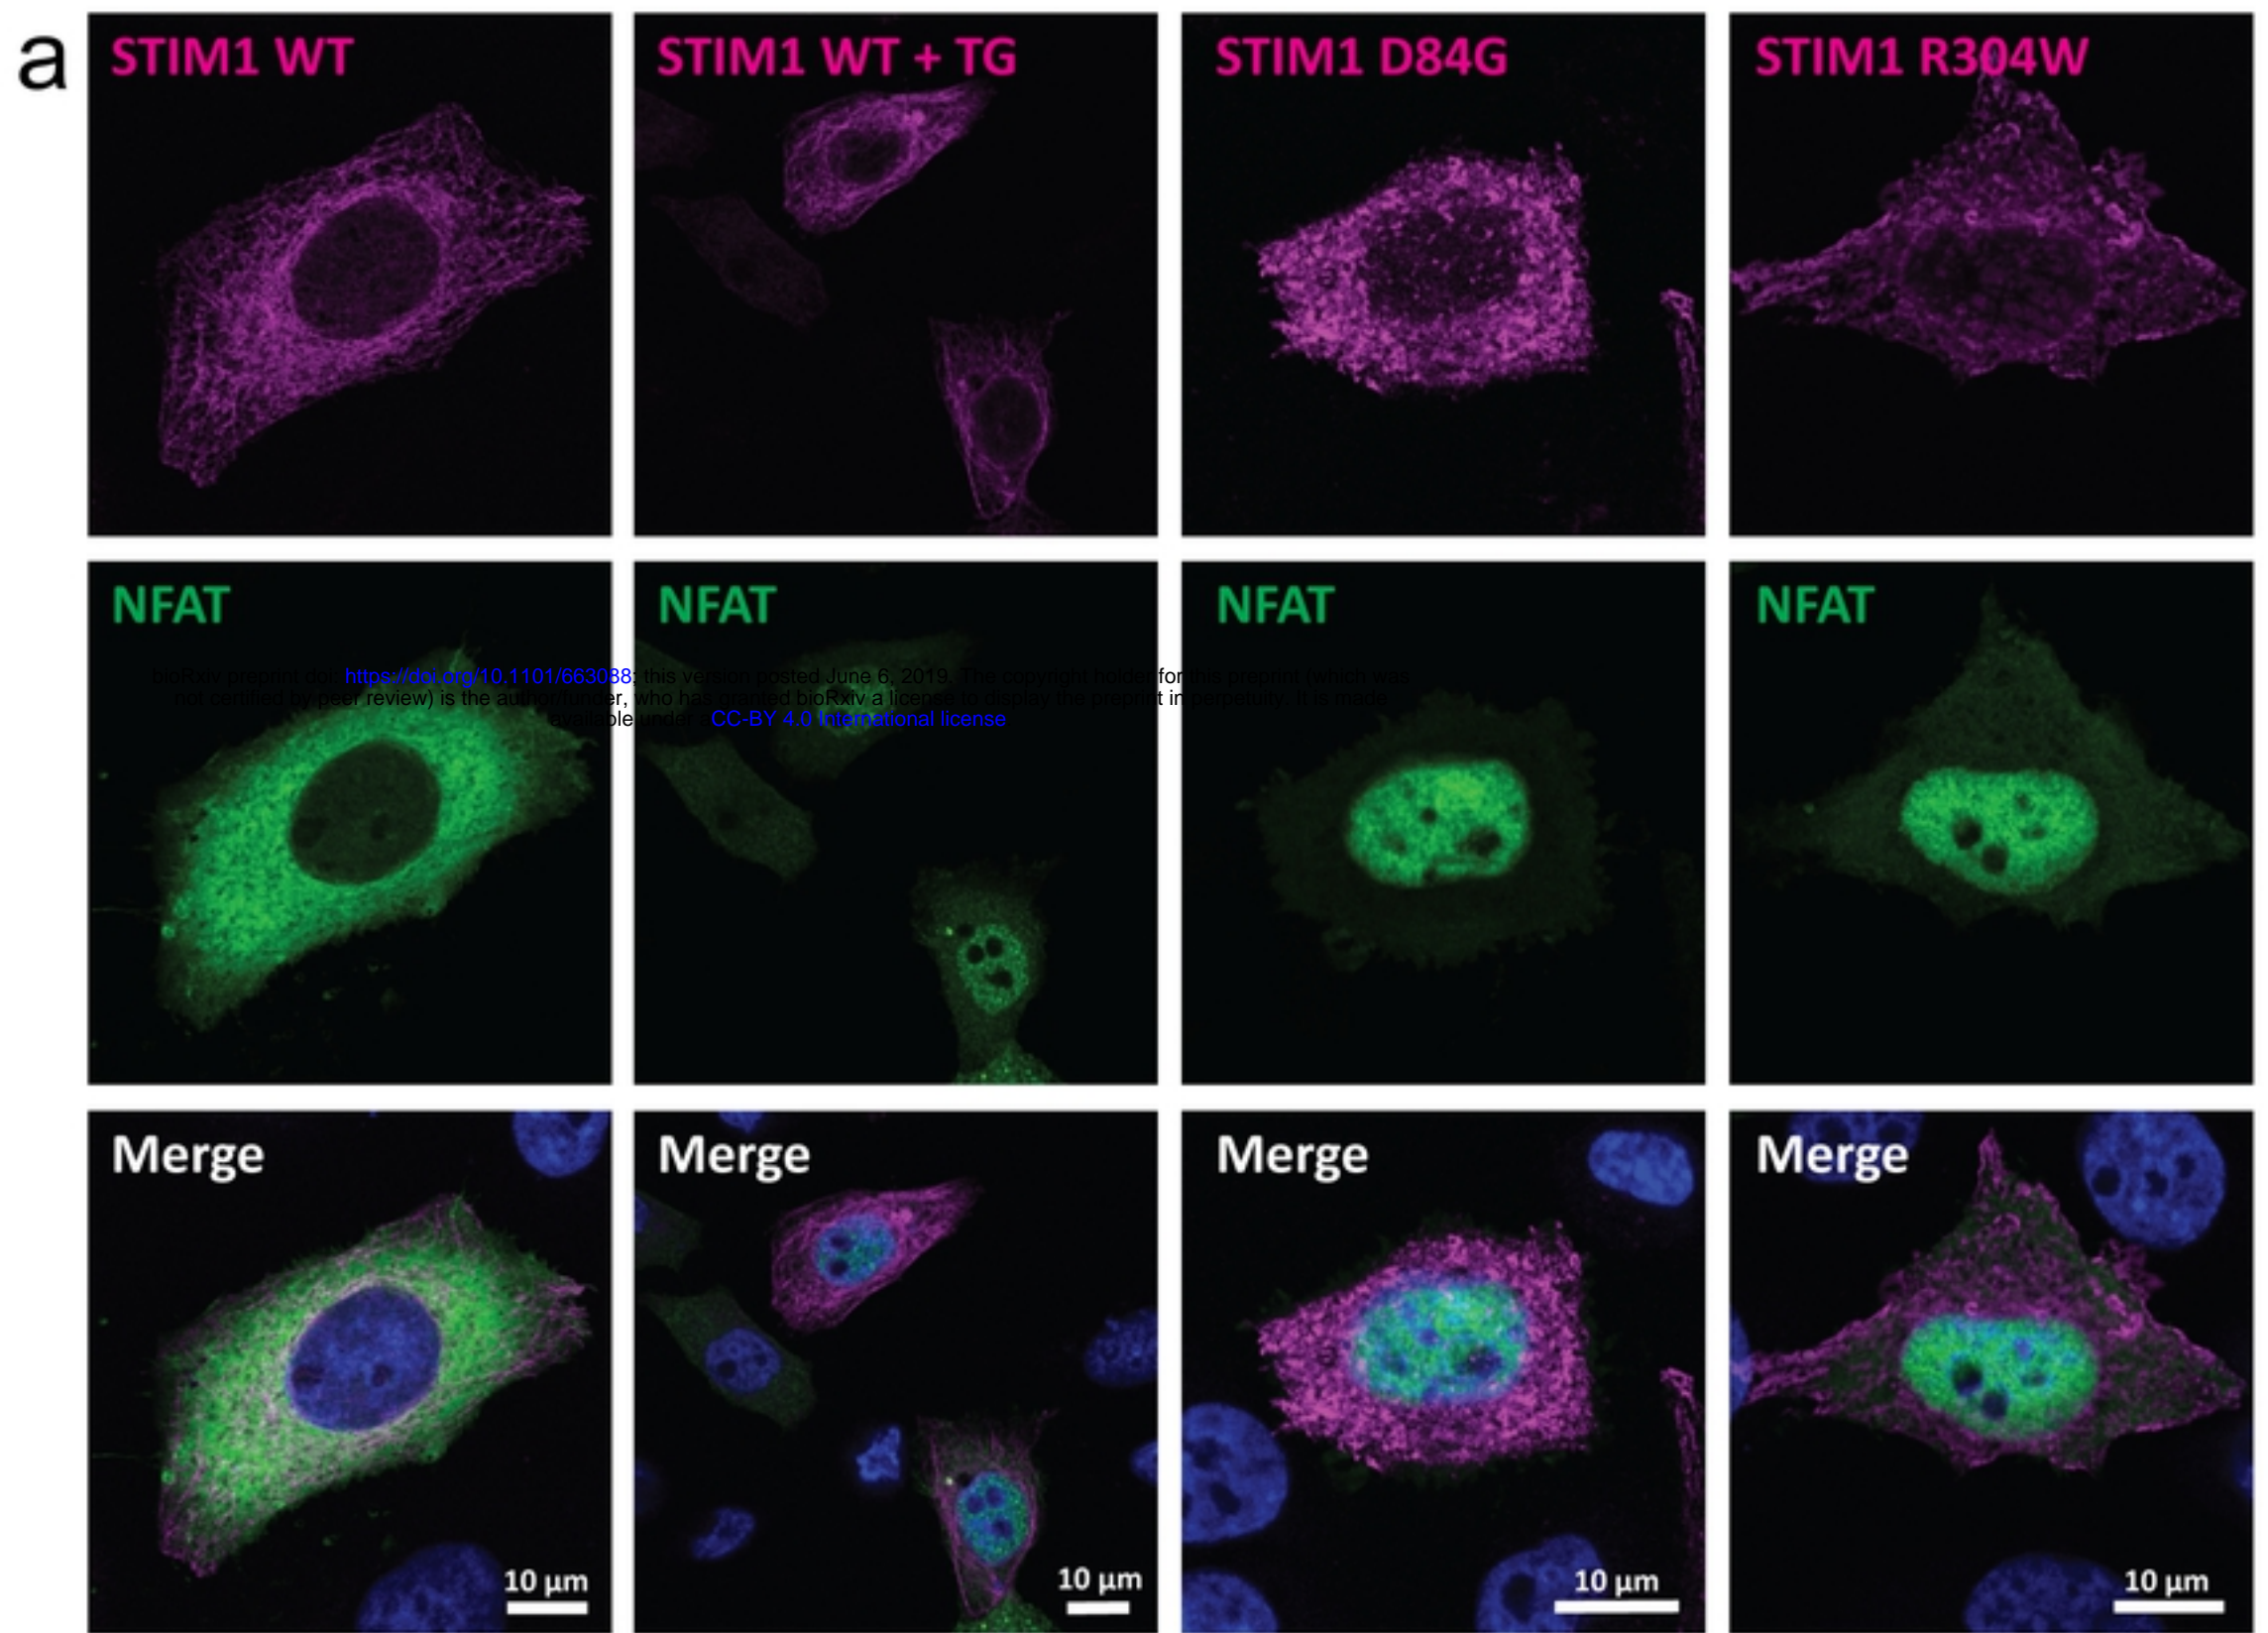

**b**

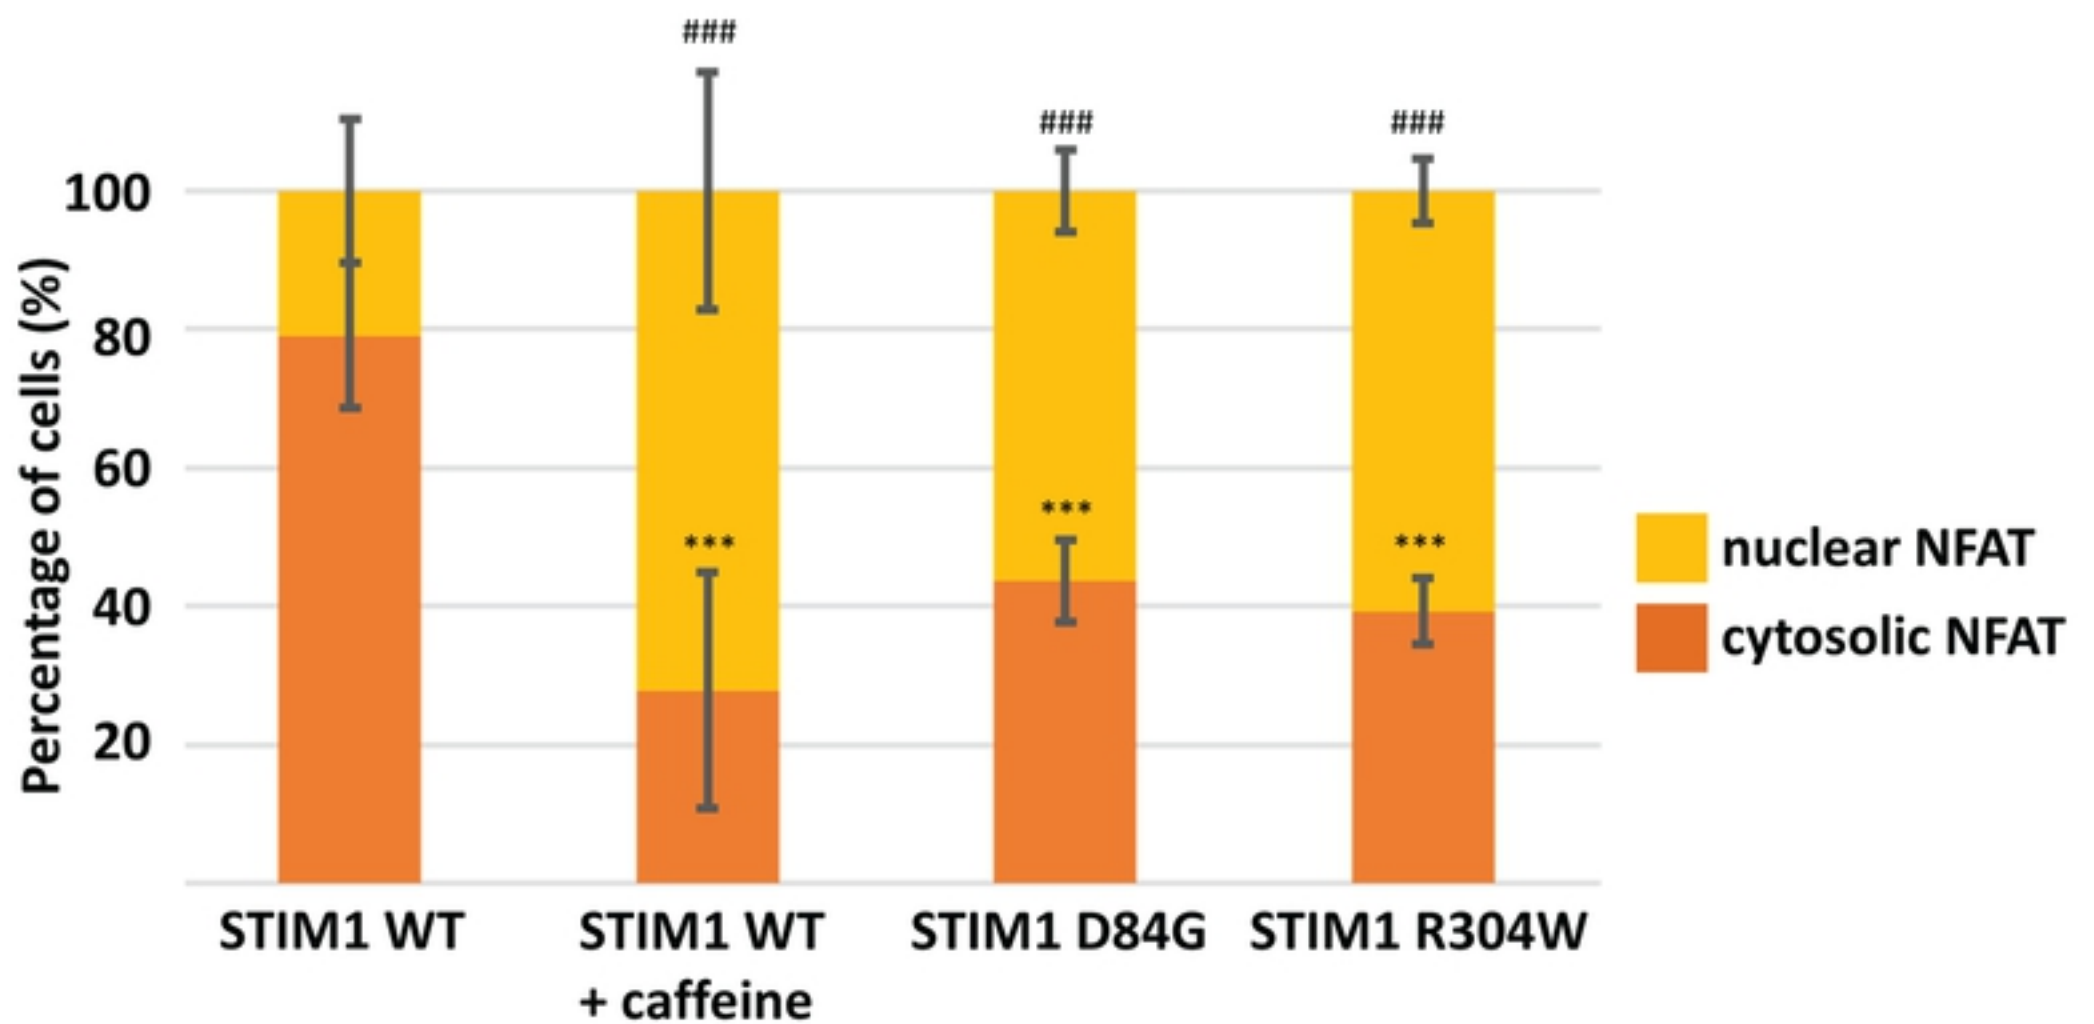

# Figure 4

bioRxiv preprint doi: <https://doi.org/10.1101/000000>; this version posted June 6, 2019. The copyright holder for this preprint (which was not certified by peer review) is the author/funder, who has granted bioRxiv a license to display the preprint in perpetuity. It is made available under aCC-BY 4.0 International license.

STIM1 WT

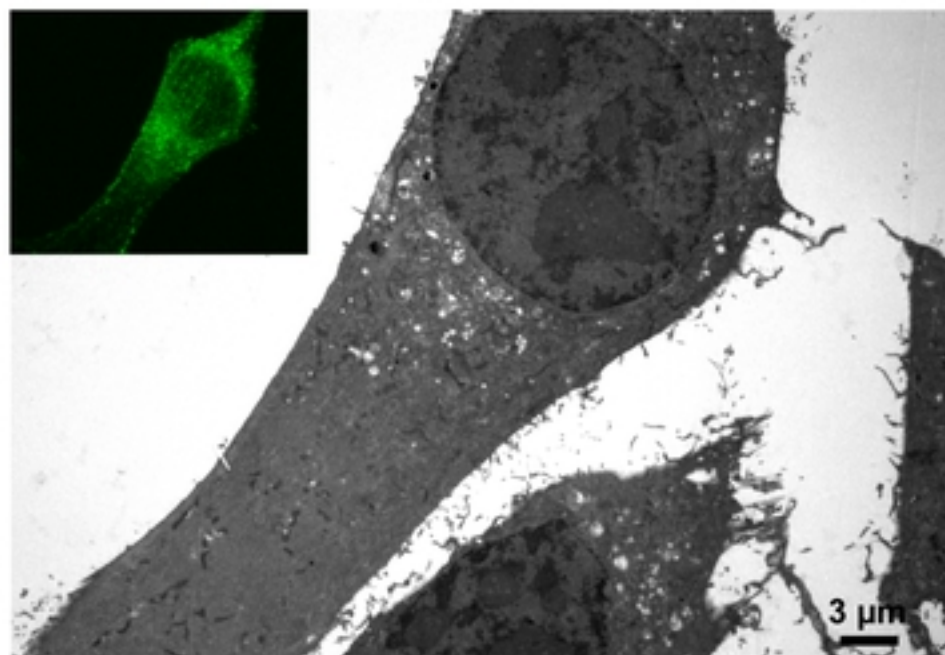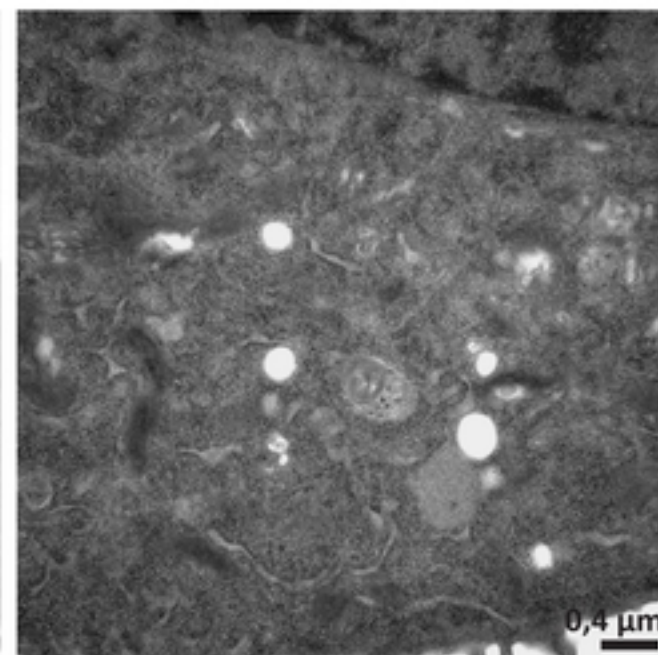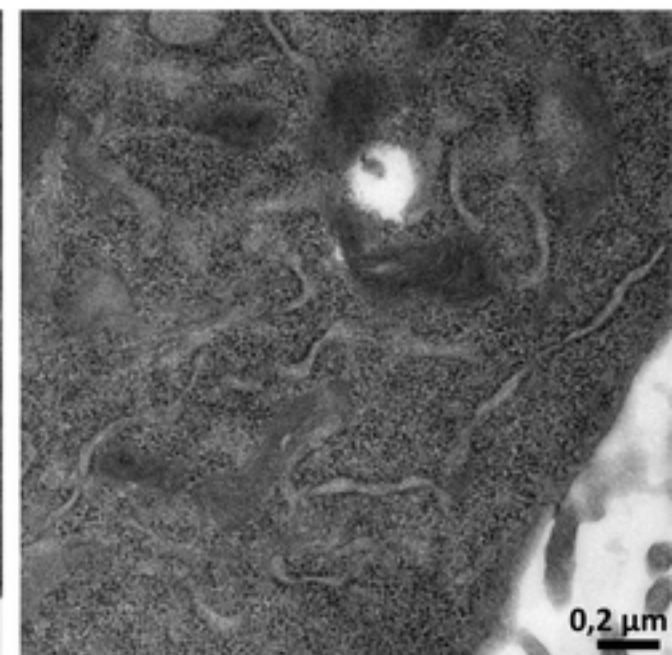

STIM1 D84G

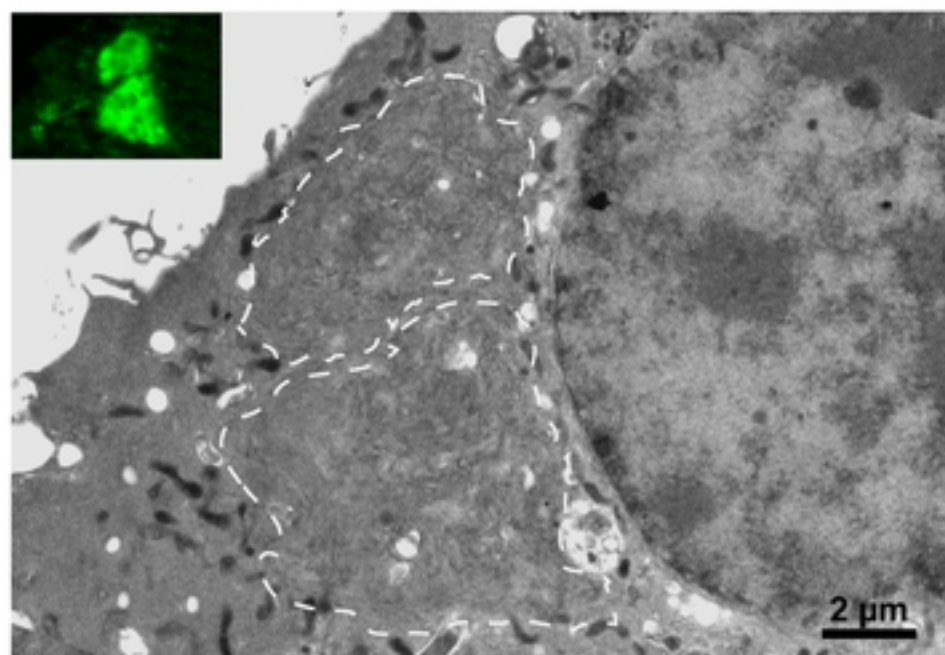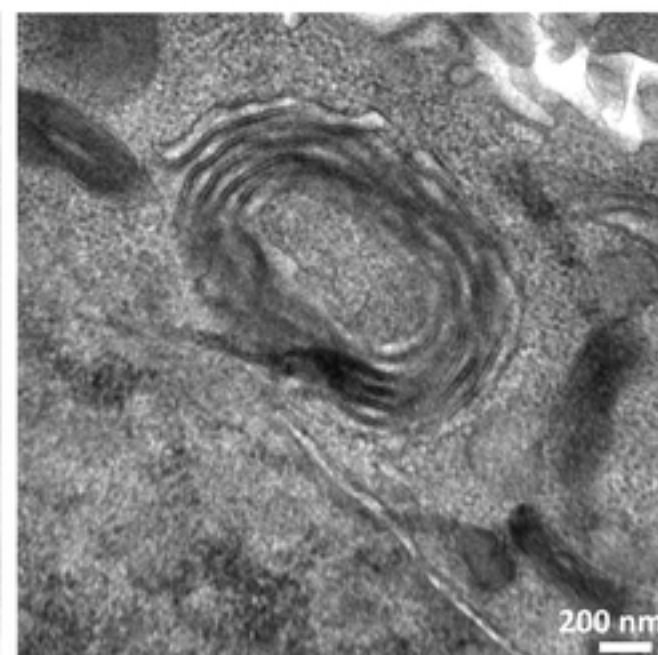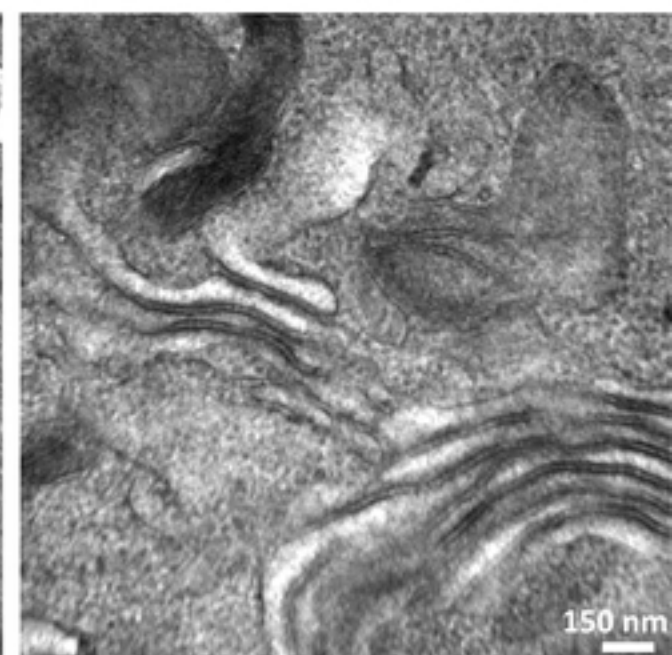

STIM1 R304W

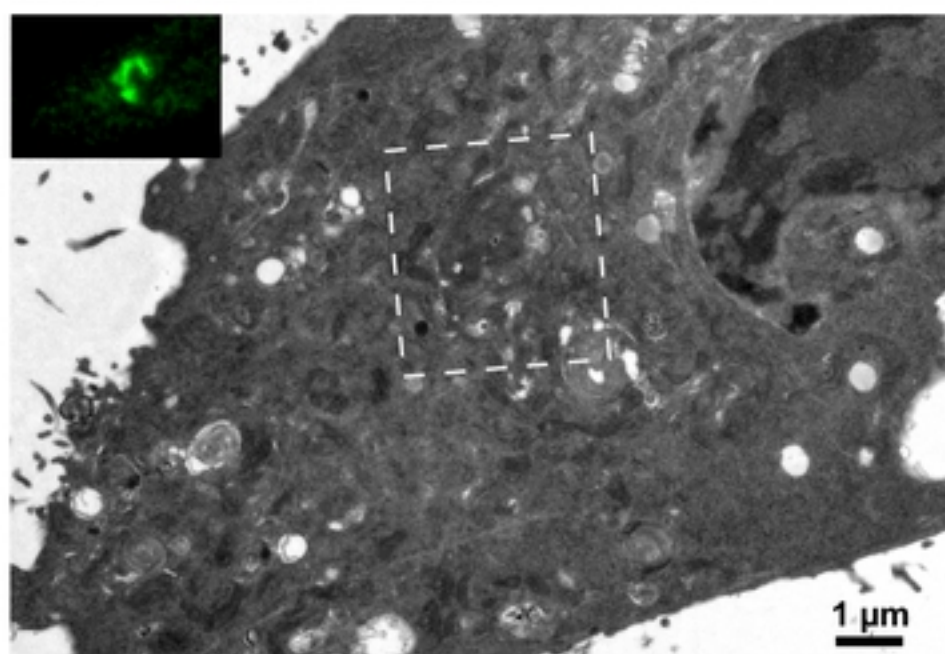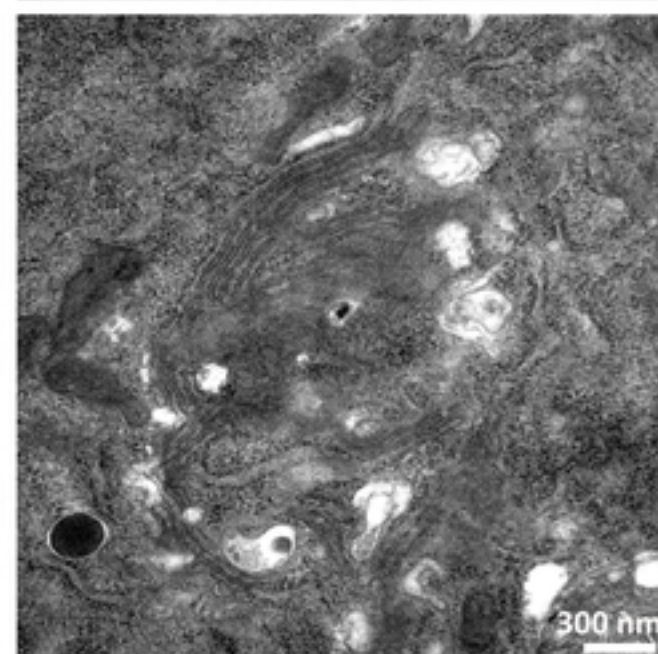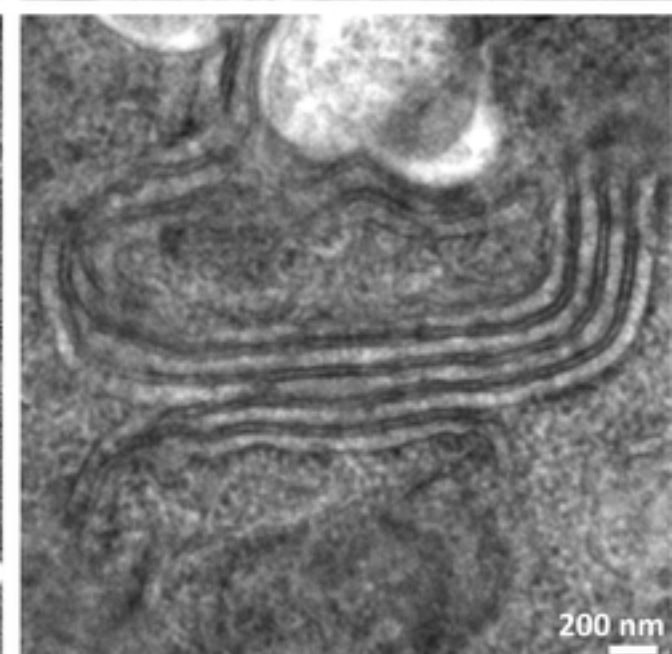

# Figure 1

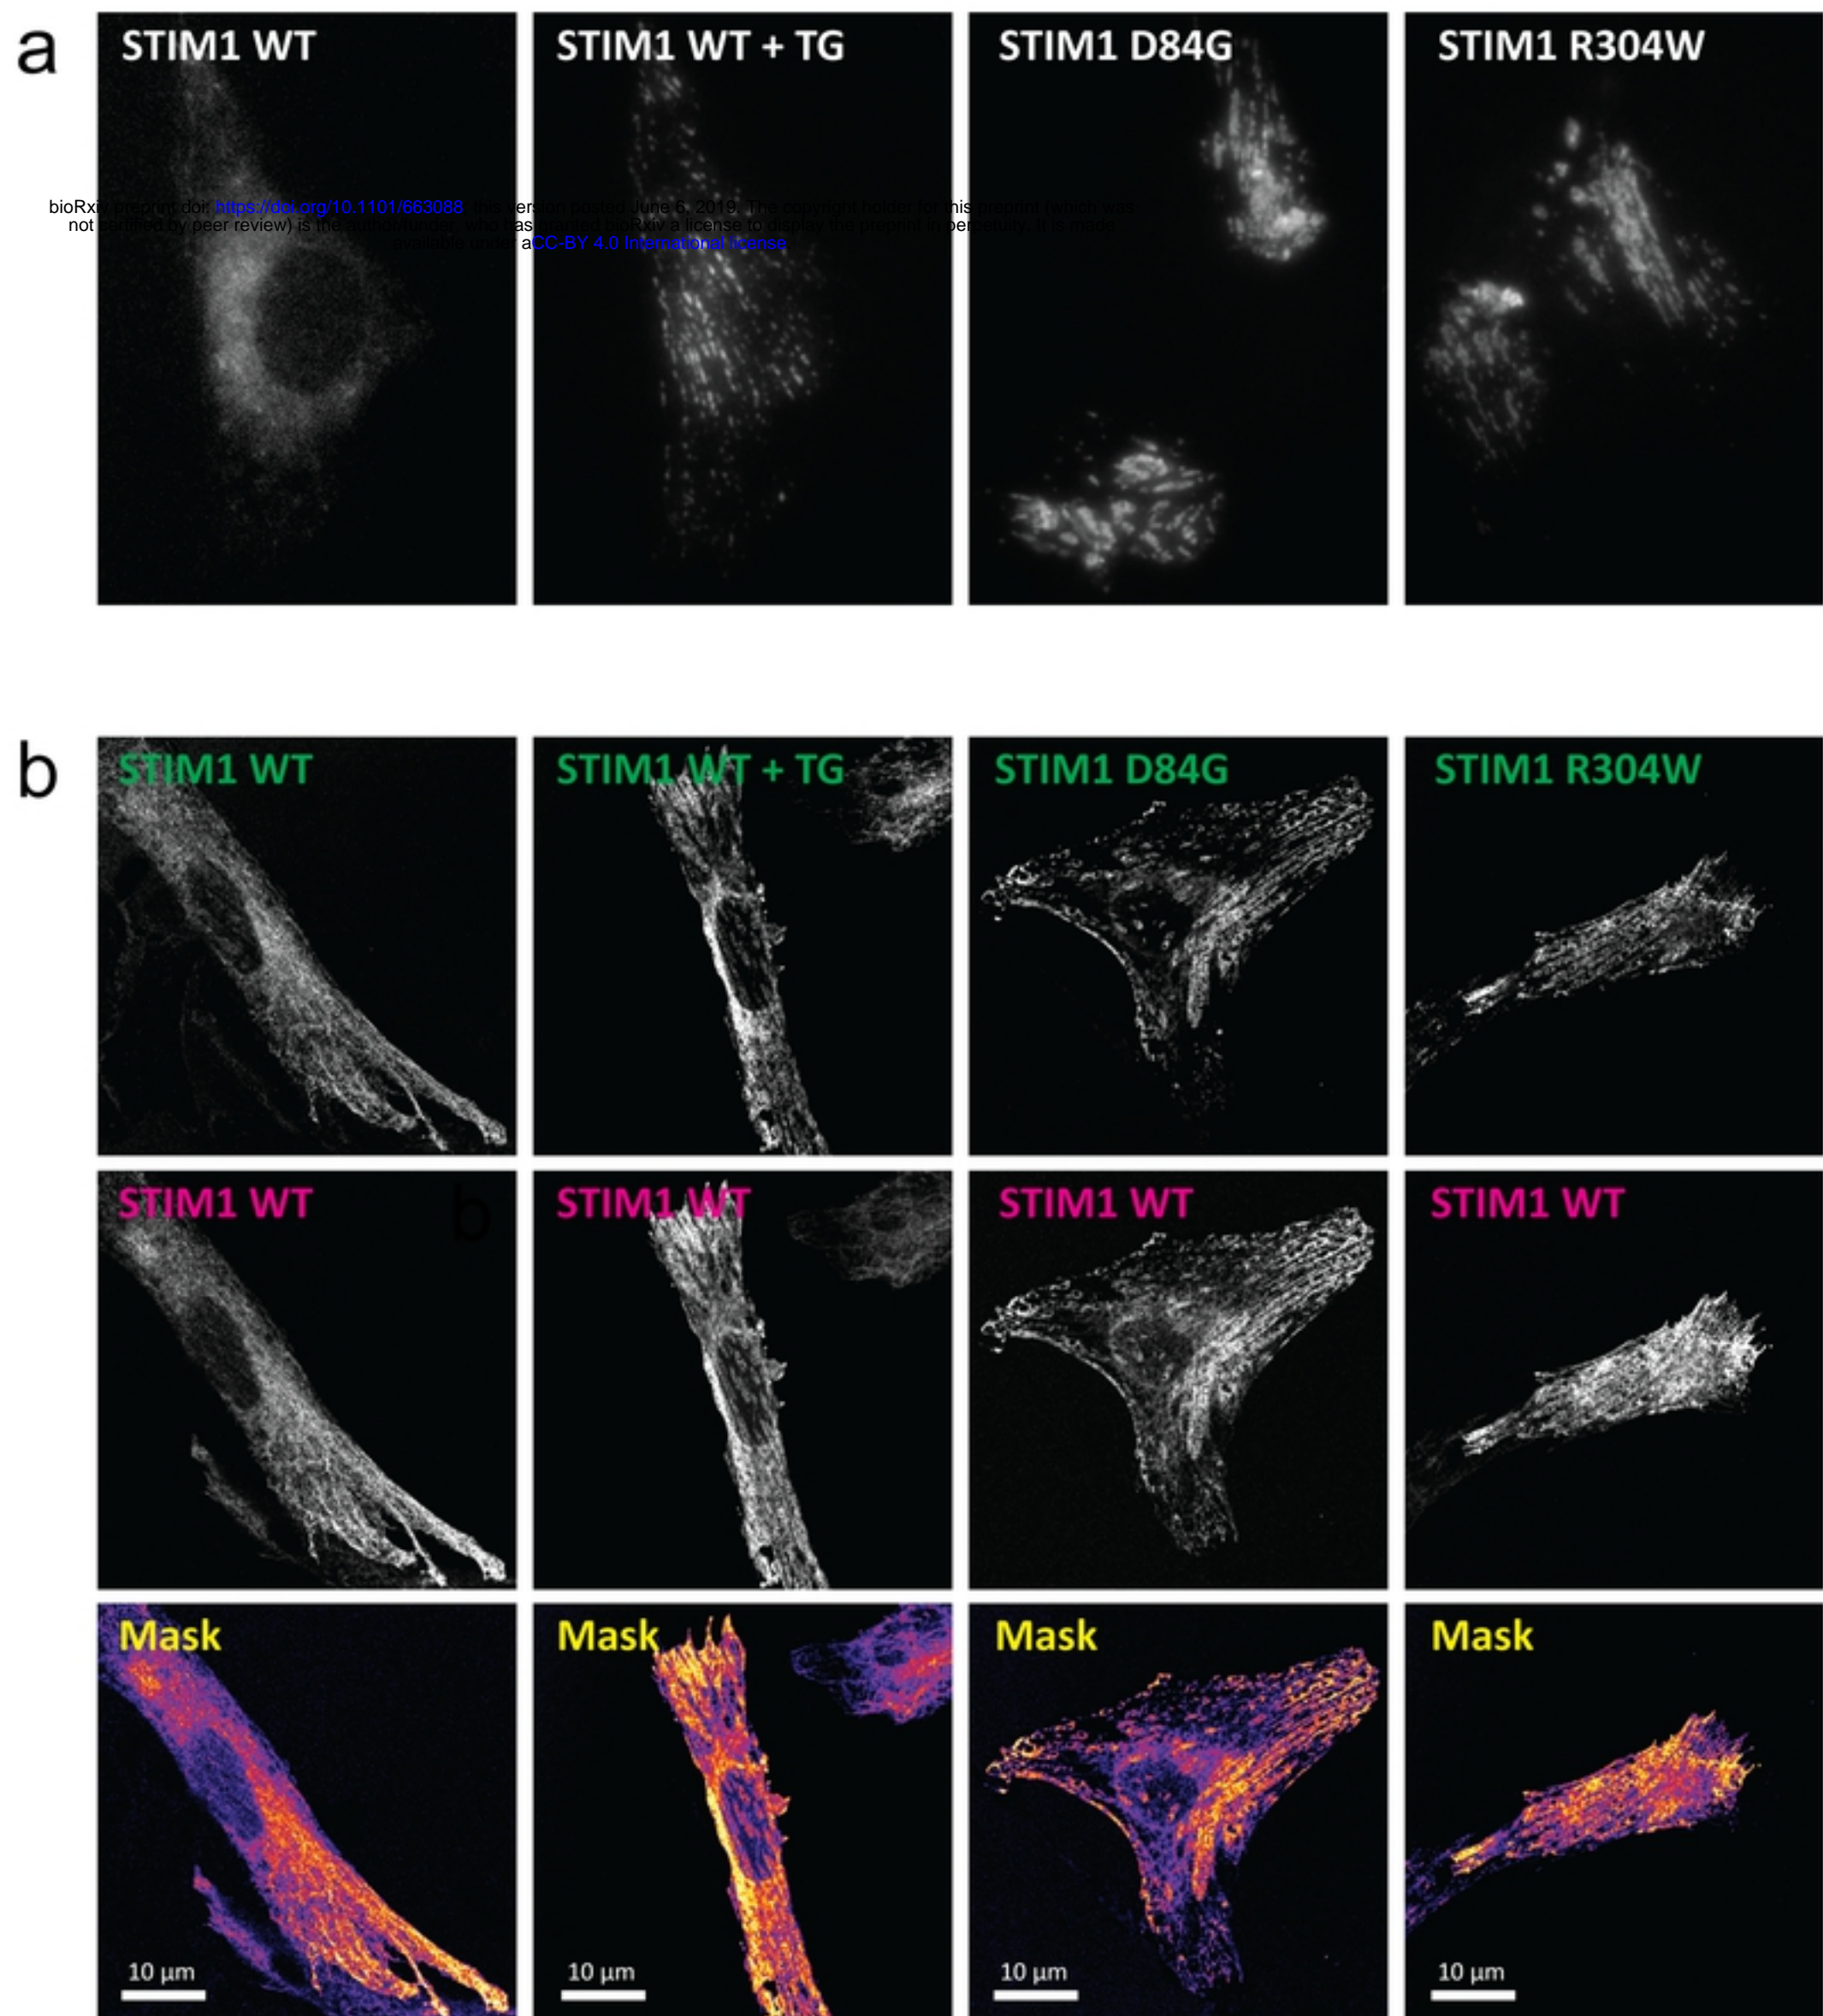

Source: https://www.biorxiv.org/content/10.1101/663088v1.full.pdf
